# Supplementary material for: Reply: Survey on the Use of Nuclear Renal Imaging in the United States
Source: HighWire-hosted journal article supplement (doi:10.2967/jnmt.117.190587), 2017-02-02
Supplement: 190587_Supplemental_Data.pdf [file 190587_Supplemental_Data.pdf]

# Utilization of Renal Scans in Nuclear Medicine Departments

[Question Summaries](#)
[Data Trends](#)
[Individual Responses](#)

[Share](#)
[Tweet](#)
[G+ Share](#)
[Share](#)

**456** responses  
**358** days (2/1/2016 - now)  
**16** views

All Pages

Q1

**On average, how many renal scans are completed in your department each month?**

Answered: 454 Skipped: 2

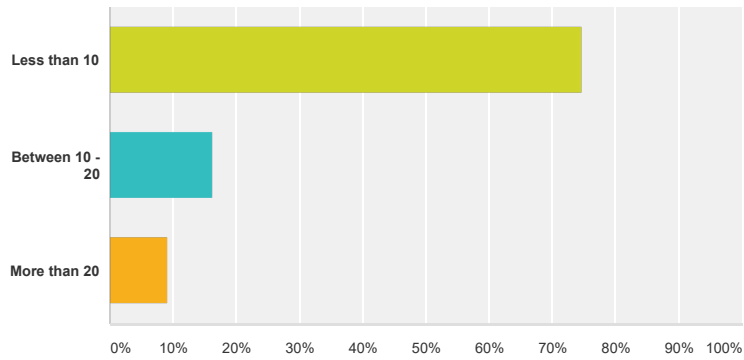

| Answer Choices  | Responses  |
|-----------------|------------|
| Less than 10    | 74.45% 338 |
| Between 10 - 20 | 16.30% 74  |
| More than 20    | 9.25% 42   |
| Total           | 454        |

Q2

**Which of the following best describes the residency status of the majority of your patient population?**

Answered: 451 Skipped: 5

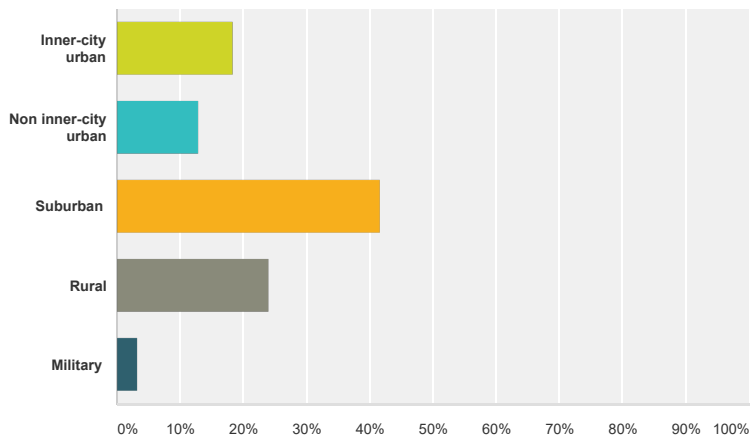

| Answer Choices       | Responses |     |
|----------------------|-----------|-----|
| Inner-city urban     | 18.40%    | 83  |
| Non inner-city urban | 12.86%    | 58  |
| Suburban             | 41.46%    | 187 |
| Rural                | 23.95%    | 108 |
| Military             | 3.33%     | 15  |
| Total                |           | 451 |

Q3

**In which region of the United States is your clinical department located?**

Answered: 452 Skipped: 4

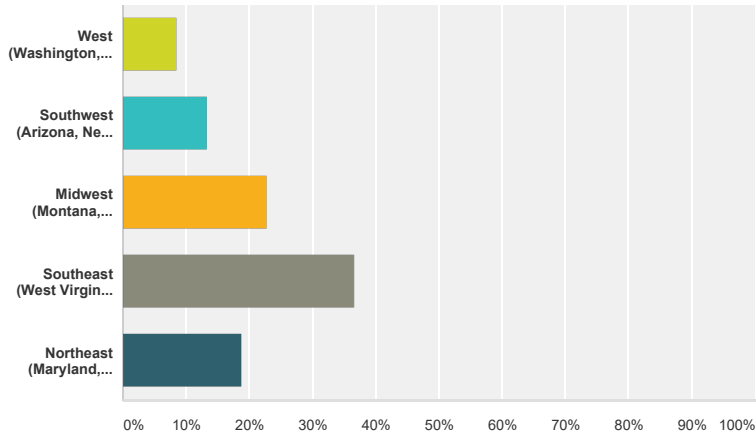

| Answer Choices                                                                                                                              | Responses |     |
|---------------------------------------------------------------------------------------------------------------------------------------------|-----------|-----|
| West (Washington, Oregon, Idaho, California, Nevada, Utah, Colorado, Alaska)                                                                | 8.63%     | 39  |
| Southwest (Arizona, New Mexico, Texas, Oklahoma, Kansas, Nebraska, Montana, Arkansas, Louisiana)                                            | 13.27%    | 60  |
| Midwest (Montana, Wyoming, North Dakota, South Dakota, Minnesota, Iowa, Wisconsin, Illinois, Indiana, Ohio, Michigan)                       | 22.79%    | 103 |
| Southeast (West Virginia, Virginia, Kentucky, Tennessee, North Carolina, South Carolina, Mississippi, Alabama, Georgia, Florida)            | 36.50%    | 165 |
| Northeast (Maryland, Delaware, New Jersey, Pennsylvania, New York, Connecticut, Maine, Rhode Island, Massachusetts, New Hampshire, Vermont) | 18.81%    | 85  |
| Total                                                                                                                                       |           | 452 |

Q4

**From what physician group are most of your renal patients referred?**

Answered: 401 Skipped: 55

Primary Care

Nephrologist

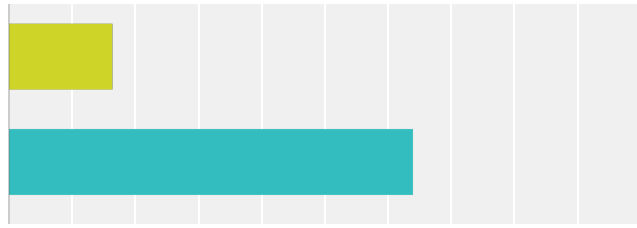

| Answer Choices         | Responses |     |
|------------------------|-----------|-----|
| Primary Care           | 16.46%    | 66  |
| Nephrologist           | 63.84%    | 256 |
| Surgeons               | 3.74%     | 15  |
| Other (please specify) | 15.96%    | 64  |
| Total                  |           | 401 |

Q5

**Which processing program is utilized in your department when completing renal scans?**

Answered: 363 Skipped: 93

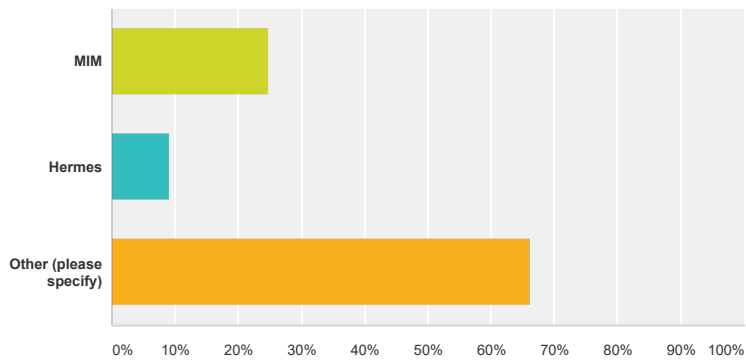

| Answer Choices         | Responses |     |
|------------------------|-----------|-----|
| MIM                    | 24.79%    | 90  |
| Hermes                 | 9.09%     | 33  |
| Other (please specify) | 66.12%    | 240 |
| Total                  |           | 363 |

Q6

**Which radiopharmaceutical is most commonly used for renal scans in your department?**

Answered: 401 Skipped: 55

99mTc-DTPA

99mTc-MAG3

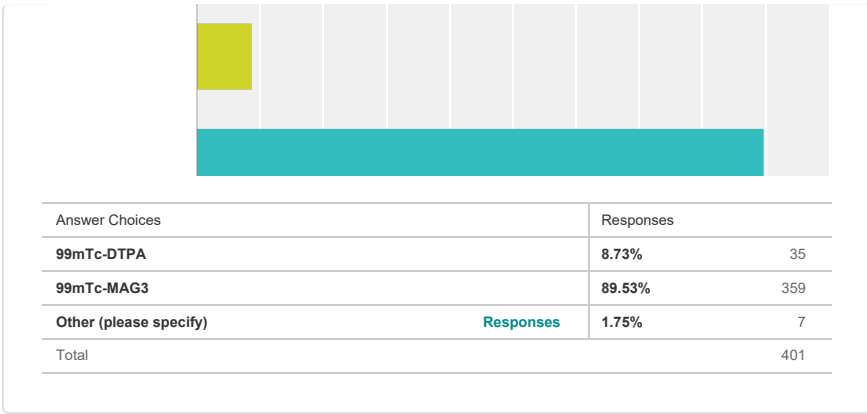

Q7

**For renal clearance/function measurements, which technique is used in your department?**

Answered: 393 Skipped: 63

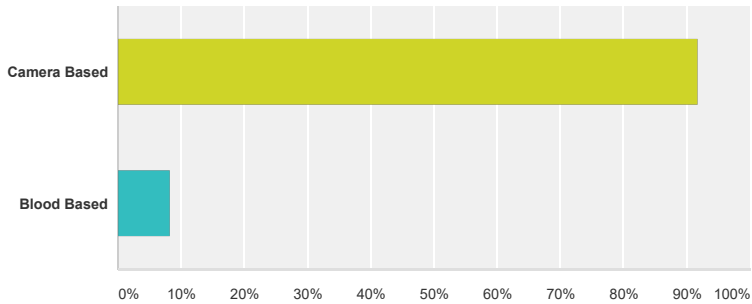

| Answer Choices | Responses  |
|----------------|------------|
| Camera Based   | 91.60% 360 |
| Blood Based    | 8.40% 33   |
| Total          | 393        |

Q8

**Is your department is affiliated with a medical center?**

Answered: 400 Skipped: 56

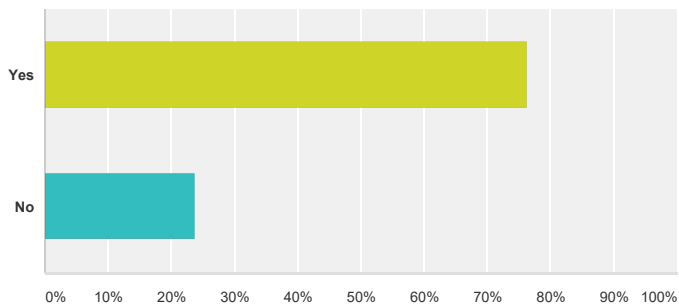

| Answer Choices | Responses |     |
|----------------|-----------|-----|
| Yes            | 76.25%    | 305 |
| No             | 23.75%    | 95  |
| Total          |           | 400 |

Q9

**Are renal transplants performed at the affiliated medical center?**

Answered: 298 Skipped: 158

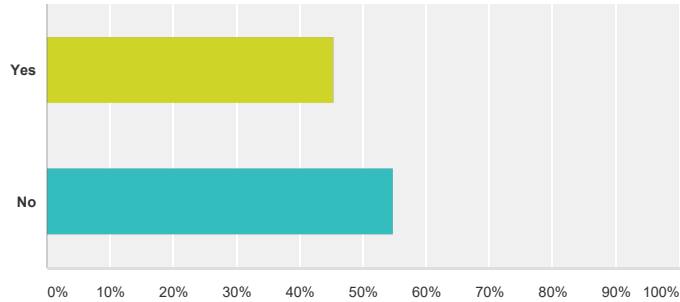

| Answer Choices | Responses |     |
|----------------|-----------|-----|
| Yes            | 45.30%    | 135 |
| No             | 54.70%    | 163 |
| Total          |           | 298 |

Q10

**Please rank the following clinical indications for renal scans from most frequent indication to less frequent indication seen in your department. (1 = most frequent, 6 = less frequent, NA = not applicable)**

Answered: 377 Skipped: 79

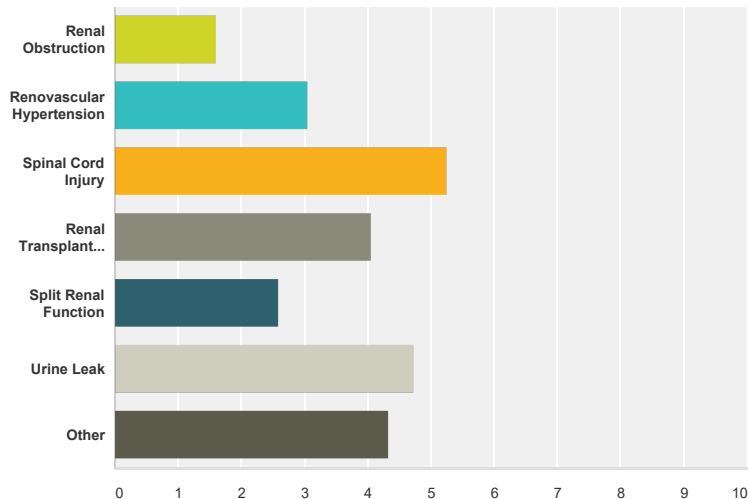

|                                  | <b>1 Most Frequent</b> | <b>2</b>      | <b>3</b>     | <b>4</b>     | <b>5</b>     | <b>6 Less Frequent</b> | <b>N/A</b>   | Total | Weighted Average |
|----------------------------------|------------------------|---------------|--------------|--------------|--------------|------------------------|--------------|-------|------------------|
| <b>Renal Obstruction</b>         | 63.61%<br>215          | 22.49%<br>76  | 7.99%<br>27  | 2.96%<br>10  | 1.78%<br>6   | 1.18%<br>4             | 0.00%<br>0   | 338   | 1.60             |
| <b>Renovascular Hypertension</b> | 14.47%<br>44           | 24.67%<br>75  | 28.29%<br>86 | 12.83%<br>39 | 11.18%<br>34 | 7.57%<br>23            | 0.99%<br>3   | 304   | 3.04             |
| <b>Spinal Cord Injury</b>        | 2.54%<br>6             | 0.42%<br>1    | 3.81%<br>9   | 7.20%<br>17  | 11.02%<br>26 | 42.37%<br>100          | 32.63%<br>77 | 236   | 5.24             |
| <b>Renal Transplant Patients</b> | 4.36%<br>13            | 6.71%<br>20   | 18.46%<br>55 | 25.50%<br>76 | 19.80%<br>59 | 14.43%<br>43           | 10.74%<br>32 | 298   | 4.04             |
| <b>Split Renal Function</b>      | 16.22%<br>54           | 38.14%<br>127 | 26.73%<br>89 | 10.51%<br>35 | 6.01%<br>20  | 2.10%<br>7             | 0.30%<br>1   | 333   | 2.58             |
| <b>Urine Leak</b>                | 1.42%<br>4             | 1.07%<br>3    | 6.76%<br>19  | 22.78%<br>64 | 33.10%<br>93 | 21.35%<br>60           | 13.52%<br>38 | 281   | 4.72             |
| <b>Other</b>                     | 6.61%<br>8             | 4.96%<br>6    | 2.48%<br>3   | 7.44%<br>9   | 15.70%<br>19 | 17.36%<br>21           | 45.45%<br>55 | 121   | 4.33             |
| <a href="#">Comments (28)</a>    |                        |               |              |              |              |                        |              |       |                  |
